# Supplementary material for: Insights into how Spt5 functions in transcription elongation and repressing transcription coupled DNA repair
Source: PubMed Central journal article supplement (PMC4066765; doi:10.1093/nar/gku333), 2014-05-09

## SUPPLEMENTARY TABLES

| <b>Supplementary Table S1.</b> Yeast strains used for shuffling with plasmids encoding Bpa-substituted proteins. |                                                      |                                                                  |                                            |
|------------------------------------------------------------------------------------------------------------------|------------------------------------------------------|------------------------------------------------------------------|--------------------------------------------|
| <b>Strain<sup>a</sup></b>                                                                                        | <b>Genotype<sup>b</sup></b>                          | <b>To be shuffled plasmids encoding Bpa substituted proteins</b> | <b>To be tested cross-linking partners</b> |
| WL119                                                                                                            | phr1Δ rpb7Δ (RPB4-3×Myc)<br>[pRS416-RPB7, pLH157]    | Rpb7                                                             | Rpb4                                       |
| WL120                                                                                                            | phr1Δ rpb7Δ (SPT5-3×Myc)<br>[pRS416-RPB7, pLH157]    | Rpb7                                                             | Spt5                                       |
| WL292                                                                                                            | phr1Δ spt5Δ (RPB4-3×Myc)<br>[pRS416-SPT5, pLH157]    | Spt5                                                             | Rpb4                                       |
| WL293                                                                                                            | phr1Δ spt5Δ (RPB7-3×Myc)<br>[pRS416-SPT5, pLH157]    | Spt5                                                             | Rpb7                                       |
| WL294                                                                                                            | phr1Δ spt5Δ [pRS416-SPT5,<br>pLH157]                 | Spt5                                                             | Rpb1                                       |
| WL296                                                                                                            | phr1Δ spt5Δ (RPB2-3×Myc)<br>[pRS416-SPT5, pLH157]    | Spt5                                                             | Rpb2                                       |
| WL303                                                                                                            | rpb7Δ spt5Δ [pRS416-RPB7,<br>pNAT- SPT5ΔCTR, pLH157] | Rpb7                                                             | CTR deleted Spt5                           |
| WL491                                                                                                            | phr1Δ rpb2Δ (SPT5-3×Myc)<br>[pRS416-RPB2, pLH157]    | Rpb2                                                             | Spt5                                       |
| WL492                                                                                                            | phr1Δ rpb1Δ (SPT5-3×Myc)<br>[pRS416-RPB1, pLH157]    | Rpb1                                                             | Spt5                                       |
| WL543                                                                                                            | phr1Δ rpb1Δ (TFA1-3×Myc)<br>[pRS416-RPB1, pLH157]    | Rpb1                                                             | Tfa1 (TFIIE)                               |
| WL590                                                                                                            | phr1Δ rpb4Δ (SPT5-3×Myc)<br>[pRS416-RPB4, pLH157]    | Rpb4                                                             | Spt5                                       |
| WL643                                                                                                            | phr1Δ rpb7Δ (TFA1-3×Myc)<br>[pRS416-RPB7, pLH157]    | Rpb7                                                             | Tfa1 (TFIIE)                               |

<sup>a</sup> All strains are isogenic to CR18 (*MATα ura3-52 trp1 his3 leu2 pep4::HIS3 rad7Δ rad26Δ*).

<sup>b</sup> Genomic genes tagged with 3×Myc are shown in parentheses; plasmids contained in a strain are shown in brackets.

**Supplementary Table S2.** SDS-PAGE conditions for Western-blot detection of cross-linkings between different proteins.

| Bpa-substituted protein (kD) | Cross-linking partner (kD) | SDS-PAGE condition                          |                                           |
|------------------------------|----------------------------|---------------------------------------------|-------------------------------------------|
|                              |                            | For Western-blot of Bpa-substituted protein | For Western-blot of cross-linking partner |
| Rpb1 (192)                   | Spt5 (116)                 | 5-10%                                       | 5-10%                                     |
|                              | Tfa1 (55)                  | 5-10%                                       | 6-18%                                     |
| Rpb2 (139)                   | Spt5 (116)                 | 5-10%                                       | 5-10%                                     |
| Rpb4 (25)                    | Spt5 (116)                 | 6-18%                                       | 6-18%                                     |
| Rpb7 (19)                    | Spt5 (116)                 | 6-20%                                       | 6%                                        |
|                              | Tfa1 (55)                  | 10%                                         | 10%                                       |
|                              | Rpb4 (25)                  | 10%                                         | 10%                                       |
| Spt5 (116)                   | Rpb1 (192)                 | 5-12%                                       | 5-12%                                     |
|                              | Rpb2 (139)                 | 4-20%                                       | 4-20%                                     |
|                              | Rpb4 (25)                  | 8%                                          | 6-18%                                     |
|                              | Rpb7 (19)                  | 8%                                          | 6-18%                                     |

**Supplementary Table S3.** Primers used for real time PCR quantification of *RPB2* fragments immunoprecipitated by anti-Rpb1 antibody 8WG16.

| Region <sup>a</sup> | Primer 1 (5' → 3')             | Primer 2 (5' → 3')         | Size of PCR product (bp) |
|---------------------|--------------------------------|----------------------------|--------------------------|
| TSS                 | GGCGAACAACAAGAAGT<br>GAGT      | ACCTGAGGAGAAGGAAT<br>GAGTG | 150                      |
| 1 kb                | AGGATATTCCTATTGTAAT<br>CATATTC | AAACCCGTCTTCAACACA<br>AG   | 134                      |
| 2.5 kb              | ATCATGCTACAACATTTAC<br>ACATTGT | TAAAAACACACCCATAGC<br>TTGC | 149                      |
| 3.9 kb              | AACCAATTTGAATGTAAG<br>GGA      | AAAATCTCTCGAACGATC<br>GGTA | 141                      |

<sup>a</sup> relative to the transcription start site (TSS).

**Supplementary Table S4.** Cross-linking of Bpa-substituted Rpb1 to Spt5 and Tfa1.

| No. | Residue | Domain     | Cross-linked to Spt5 | Cross-linked to Tfa1 |
|-----|---------|------------|----------------------|----------------------|
| 1   | K217    | Clamp head | No                   | x                    |
| 2   | L279    | Clamp core | No                   | x                    |
| 3   | H281    | Clamp core | Yes                  | No                   |
| 4   | H286    | Clamp core | No                   | Yes                  |
| 5   | E291    | Clamp core | Yes                  | No                   |
| 6   | K688    | Funnel     | No                   | x                    |
| 7   | K924    | Foot       | No                   | x                    |
| 8   | E1167   | Jaw        | No                   | x                    |

"x" not tested.

| <b>Supplementary Table S5. Cross-linking of Bpa-substituted Rpb2 to Spt5.</b> |                |                 |                             |
|-------------------------------------------------------------------------------|----------------|-----------------|-----------------------------|
| <b>No.</b>                                                                    | <b>Residue</b> | <b>Domain</b>   | <b>Cross-linked to Spt5</b> |
| 1                                                                             | Y57            | Protrusion      | No                          |
| 2                                                                             | I90            | Protrusion      | No                          |
| 3                                                                             | N103           | Wall-Protrusion | No                          |
| 4                                                                             | V108           | Wall-Protrusion | No                          |
| 5                                                                             | K134           | Protrusion      | No                          |
| 6                                                                             | K164           | Protrusion      | No                          |
| 7                                                                             | K277           | Lobe            | No                          |
| 8                                                                             | Q278           | Lobe            | No                          |
| 9                                                                             | V323           | Lobe            | No                          |
| 10                                                                            | K347           | Lobe            | No                          |
| 11                                                                            | K426           | Protrusion      | x                           |
| 12                                                                            | F429           | Protrusion      | x                           |
| 13                                                                            | R430           | Protrusion      | x                           |
| 14                                                                            | Q433           | Protrusion      | Yes                         |
| 15                                                                            | R434           | Protrusion      | No                          |
| 16                                                                            | E437           | Protrusion      | Yes                         |
| 17                                                                            | N881           | Wall            | No                          |
| 18                                                                            | S919           | Wall            | Yes                         |
| 19                                                                            | Y931           | Wall            | No                          |
| 20                                                                            | H1177          | Clamp base      | Yes                         |

“x” not tested due to lethality of the Bpa substitution.

| <b>Supplementary Table S6. Cross-linking of Bpa-substituted Rpb4 to Spt5.</b> |                |                             |
|-------------------------------------------------------------------------------|----------------|-----------------------------|
| <b>No.</b>                                                                    | <b>Residue</b> | <b>Cross-linked to Spt5</b> |
| 1                                                                             | K17            | No                          |
| 2                                                                             | E19            | Yes                         |
| 3                                                                             | E21            | Yes                         |
| 4                                                                             | Q41            | No                          |
| 5                                                                             | K60            | No                          |
| 6                                                                             | K75            | Yes                         |
| 7                                                                             | E120           | No                          |
| 8                                                                             | E124           | No                          |
| 9                                                                             | N137           | Yes                         |
| 10                                                                            | K139           | Yes                         |

| <b>Supplementary Table S7. Cross-linking of Bpa-substituted Rpb7 to Spt5 and Tfa1.</b> |                     |                             |                             |
|----------------------------------------------------------------------------------------|---------------------|-----------------------------|-----------------------------|
| <b>No.</b>                                                                             | <b>Rpb7 Residue</b> | <b>Cross-linked to Spt5</b> | <b>Cross-linked to Tfa1</b> |
| 1                                                                                      | F17                 | Yes                         | No                          |
| 2                                                                                      | N53                 | Yes                         | No                          |
| 3                                                                                      | Q57                 | No                          | No                          |
| 4                                                                                      | L62                 | No                          | No                          |
| 5                                                                                      | H97                 | Yes                         | No                          |
| 6                                                                                      | E100                | Yes                         | No                          |
| 7                                                                                      | R142                | No                          | No                          |
| 8                                                                                      | E148                | Yes                         | No                          |
| 9                                                                                      | I151                | Yes                         | Yes                         |
| 10                                                                                     | H158                | Yes                         | No                          |
| 11                                                                                     | I160                | Yes                         | Yes                         |

**Supplementary Table S8.** Cross-linking of Bpa-substituted Spt5 to Rpb1, Rpb2, Rpb4 and Rpb7.

| No. | Residue | Region          | Cross-linked to |      |      |      |
|-----|---------|-----------------|-----------------|------|------|------|
|     |         |                 | Rpb1            | Rpb2 | Rpb4 | Rpb7 |
| 1   | Q16     | acidic          | No              | No   | No   | No   |
| 2   | E53     | acidic          | No              | No   | No   | No   |
| 3   | E251    | linker          | No              | No   | No   | No   |
| 4   | R291    | NGN             | No              | No   | No   | No   |
| 5   | R293    | NGN             | No              | No   | No   | No   |
| 6   | K296    | NGN             | No              | Yes  | No   | No   |
| 7   | R313    | NGN             | No              | Yes  | No   | No   |
| 8   | K317    | NGN             | No              | No   | No   | No   |
| 9   | K318    | NGN             | No              | No   | No   | No   |
| 10  | E338    | NGN             | No              | No   | No   | No   |
| 11  | N350    | NGN             | No              | Yes  | No   | No   |
| 12  | D354    | NGN             | No              | Yes  | No   | No   |
| 13  | E367    | NGN             | Yes             | No   | No   | No   |
| 14  | E383    | KOW1            | No              | No   | No   | No   |
| 15  | Q433    | KOW1            | No              | No   | No   | No   |
| 16  | R458    | linker (KOW1-2) | No              | No   | No   | No   |
| 17  | Q522    | linker (KOW1-2) | No              | No   | No   | No   |
| 18  | R539    | KOW2            | No              | No   | No   | No   |
| 19  | D560    | KOW2            | No              | No   | No   | No   |
| 20  | E585    | KOW3            | No              | No   | No   | No   |
| 21  | E608    | KOW3            | Yes             | No   | No   | No   |
| 22  | E642    | linker (KOW3-4) | No              | No   | No   | No   |
| 23  | K654    | linker (KOW3-4) | No              | No   | No   | No   |
| 24  | E672    | linker (KOW3-4) | No              | No   | No   | No   |
| 25  | K706    | KOW4            | Yes             | No   | No   | No   |
| 26  | E720    | KOW4            | No              | No   | Yes  | Yes  |
| 27  | K737    | KOW4            | No              | No   | Yes  | No   |
| 28  | K758    | linker (KOW4-5) | No              | No   | Yes  | No   |
| 29  | K765    | linker (KOW4-5) | No              | No   | Yes  | No   |
| 30  | K778    | linker (KOW4-5) | No              | No   | No   | No   |
| 31  | K785    | linker (KOW4-5) | No              | No   | No   | No   |
| 32  | Q792    | linker (KOW4-5) | No              | No   | No   | No   |
| 33  | D821    | KOW5            | Yes             | No   | No   | No   |
| 35  | K834    | KOW5            | No              | No   | No   | No   |
| 36  | H843    | KOW5            | No              | No   | No   | No   |
| 37  | E854    | Linker          | No              | No   | No   | No   |
| 38  | Y1011   | CTR             | No              | No   | No   | No   |

| <b>Supplementary Table S9. Cross-linking of Bpa-substituted Rpb7 to CTR Deleted Spt5.</b> |                |                                         |
|-------------------------------------------------------------------------------------------|----------------|-----------------------------------------|
| <b>No.</b>                                                                                | <b>Residue</b> | <b>Cross-linked to CTR deleted Spt5</b> |
| 1                                                                                         | I160           | x                                       |
| 2                                                                                         | H158           | Yes                                     |
| 3                                                                                         | I151           | Yes                                     |
| 4                                                                                         | E148           | Yes                                     |
| 5                                                                                         | E100           | Yes                                     |
| 6                                                                                         | H97            | Yes                                     |
| 7                                                                                         | F17            | Yes                                     |
| 8                                                                                         | N53            | Yes                                     |

“x” not tested due to lethality of the Bpa substitution combined with the Spt5 CTR deletion.

## **SUPPLEMENTARY FIGURE LEGENDS**

**Supplementary Figure S1.** Domains of NusG in bacteria and Spt5 in archaea and eukaryotes. The NGN domain of Spt5 interacts with Spt4 in archaea and eukaryotes.

**Supplementary Figure S2.** Bpa substitution of a residue of protein of interest and photo-cross-linking in living yeast cells. (A) Plasmid pLH157, which contains genetically engineered *E. coli* tRNA synthetase (Ec-TyrRS) and tRNA (Ec-tRNA<sub>CUA</sub>) genes for incorporating Bpa through nonsense suppression of the TAG codon. (B) Plasmid pGOI-TAG, which bears a gene of interest (GOI) with a TAG codon substituting a normal amino acid codon. This plasmid was transformed through plasmid shuffling into a yeast strain whose genomic GOI is deleted and contains pLH157. (C) Structure of Bpa. (D) Rpb4/7 subcomplex of RNAP II showing the location of Rpb7 F42 (based on PDB 1Y1W). (E) Western blots showing substitution of Rpb7 F42 with Bpa caused cross-linking to Rpb4. Red asterisks indicate bands of cross-linked 3×Flag tagged Rpb4 and 3×Myc tagged Rpb7 (Rpb4+Rpb7), which can be detected with anti-Flag and anti-Myc antibodies.

**Supplementary Figure S3.** Cross-linking of Bpa-substituted Rpb1, Rpb2, Rpb4 and Rpb7 to interacting proteins. (A-D) Western blots. Sites of Bpa substitutions are shown above the lanes of each blot. Shifted bands presumably caused by cross-linking to Spt5 are marked with red arrow heads. Rpb1 was detected with antibody 8WG16. 3×Myc tagged Rpb2, Rpb4 and Rpb7 were detected with an anti-Myc antibody.

**Supplementary Figure S4.** Locations of Bpa-substituted residues on a model structure of Spt5. The domains of Spt5 are shown in different colors as indicated. Residues that cross-linked to RNAP II subunits are shown in violet and those that did not cross-link to the subunits are shown in black. See Supplementary Table S8 for a list of all Bpa-substituted residues in Spt5. The model structure of Spt5 was generated by using the I-TASSER server (<http://zhanglab.ccmb.med.umich.edu/I-TASSER>). Note that the model structure of Spt5 may be disparate from real situation, because even the NGN domain in the model structure is very different from that in the real crystal structure of Spt5 NGN bound to Spt4.

**Supplementary Figure S5.** Cross-linking of Bpa-substituted Spt5 to Rpb1, Rpb2, Rpb4 and Rpb7. (A-D) Western blots. Sites of Bpa substitutions are shown above the lanes of each blot. Shifted bands presumably caused by cross-linking of Spt5 to the different RNAP II subunits are marked with red arrow heads. 3×Flag tagged Spt5 was detected with an anti-Flag antibody.

# Supplementary Figure S1

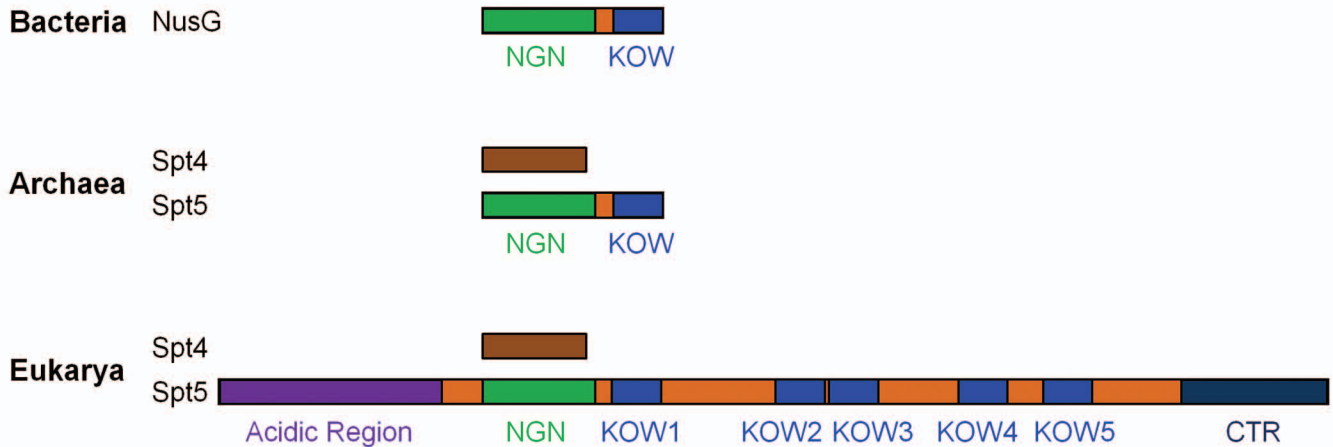



# Supplementary Figure S2

**A**

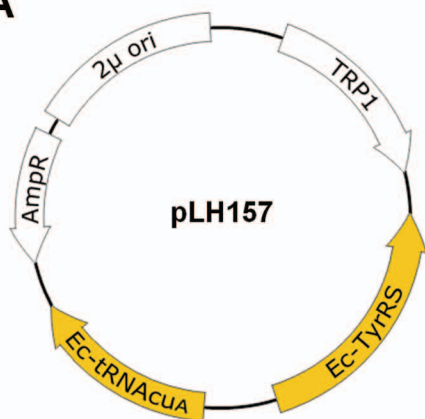

**B**

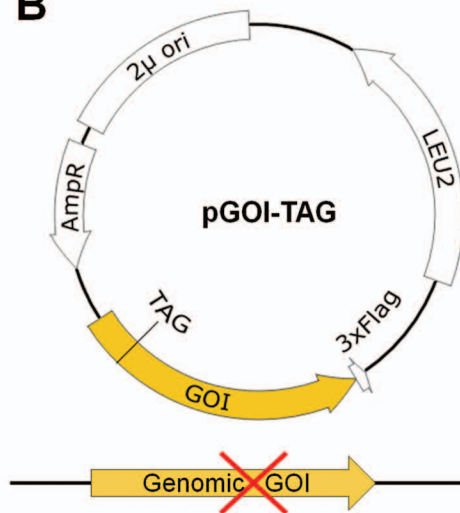

**C**

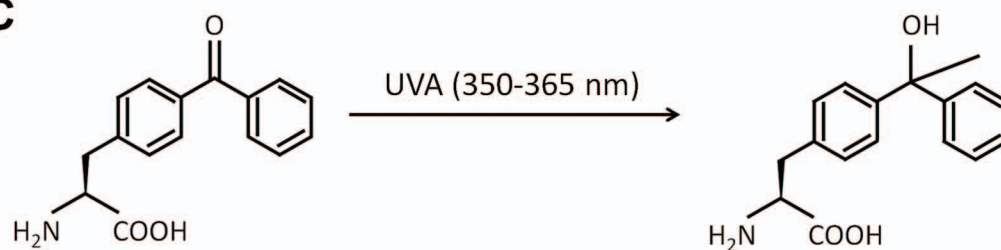

**D**

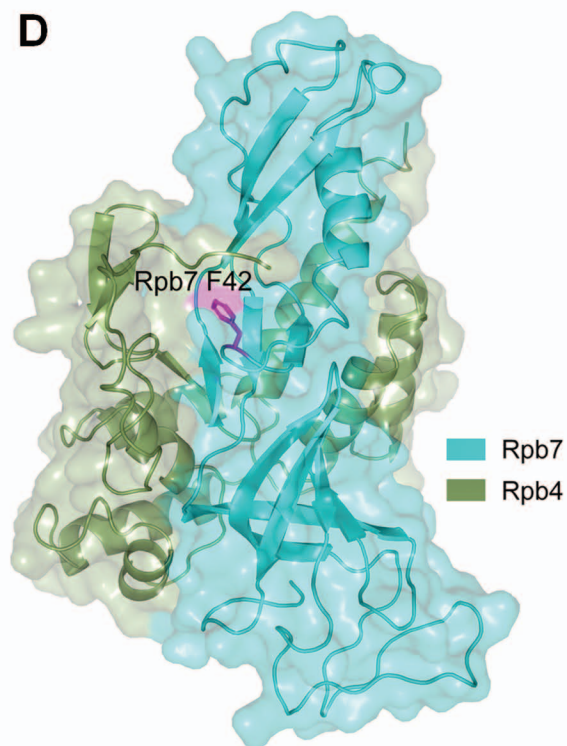

**E**

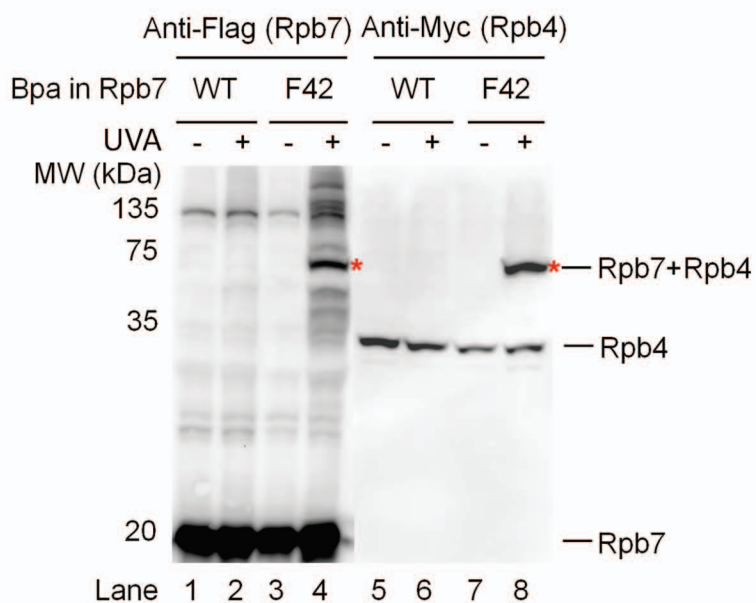

# Supplementary Figure S3

## A

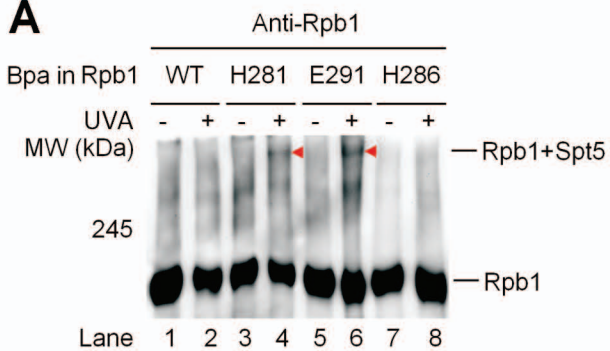

## B

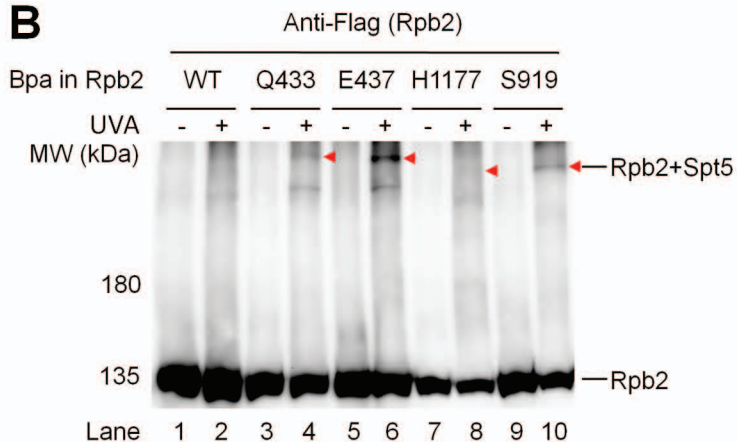

## C

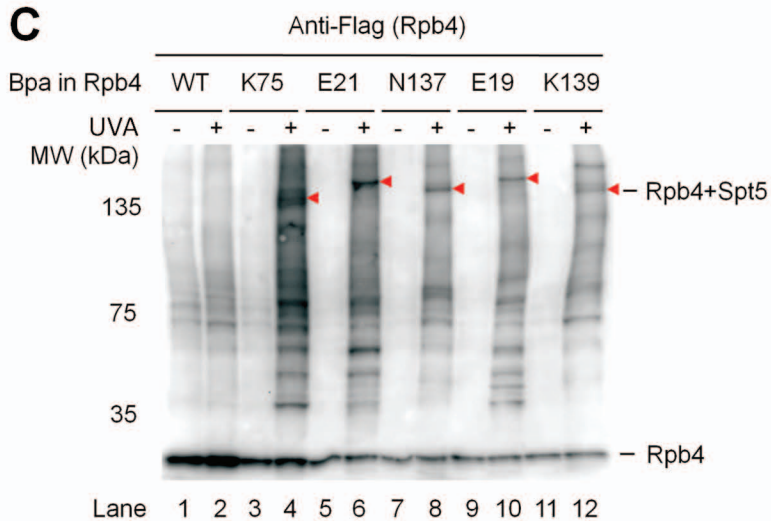

## D

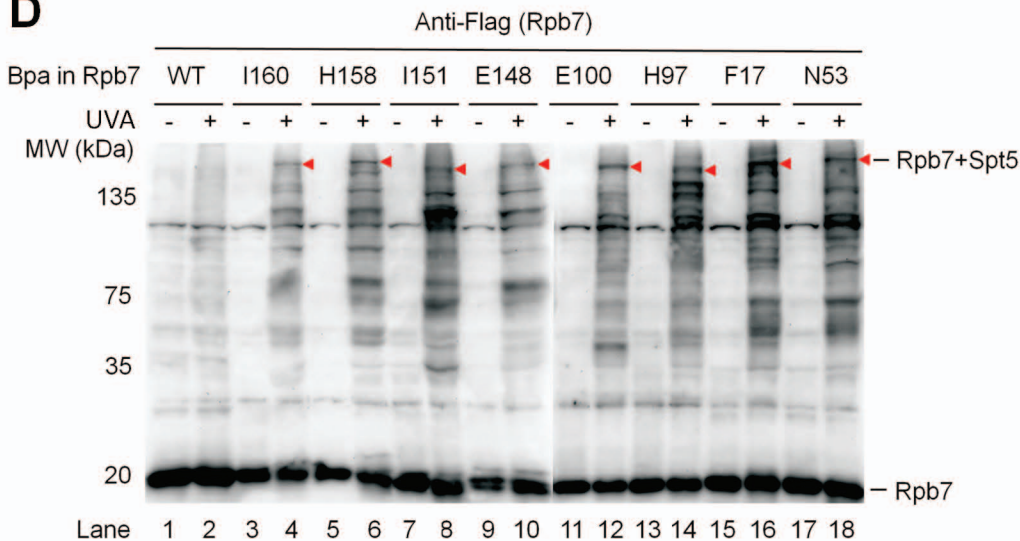

# Supplementary Figure S4

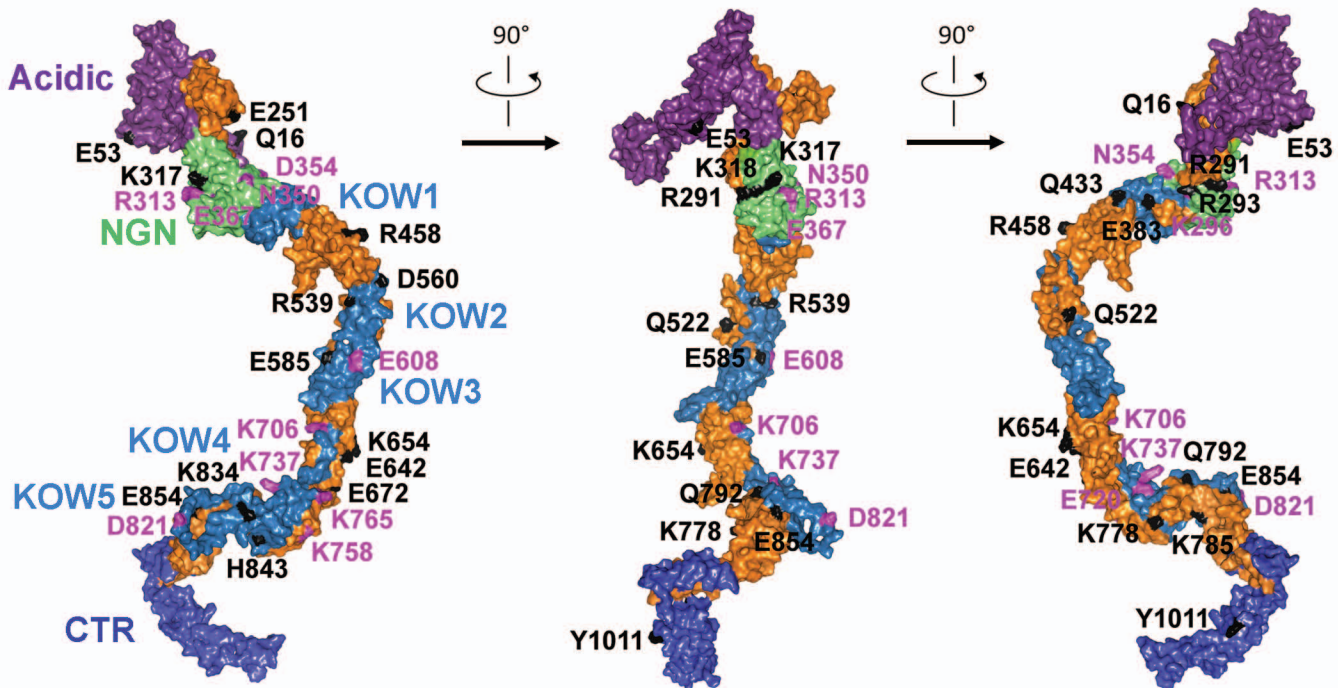

# Supplementary Figure S5

**A**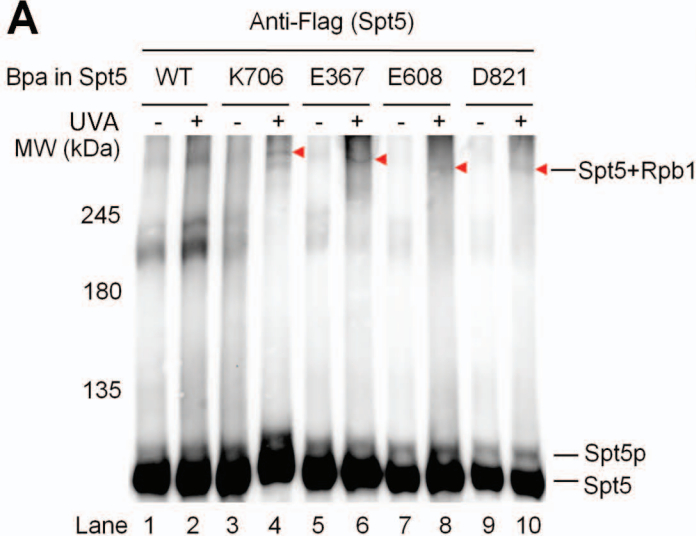**B**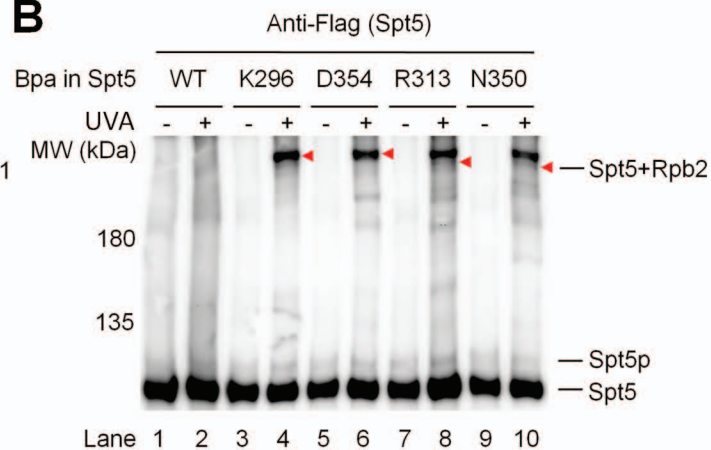**C**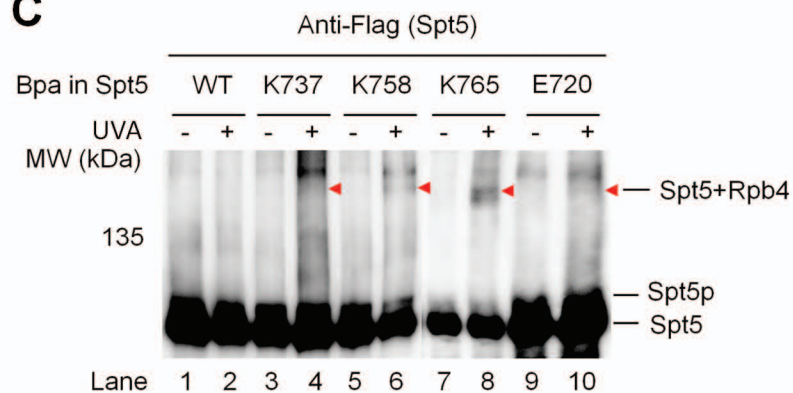**D**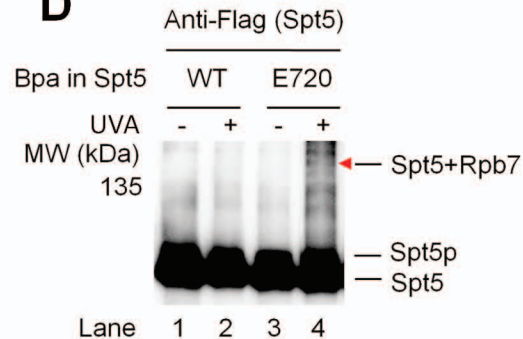

Supplement: supp_gku333_nar-03675-z-2013-File010.pdf [file supp_gku333_nar-03675-z-2013-File010.pdf]
